# Supplementary material for: Severe Obstructive Sleep Apnea Disrupts Vigilance-State-Dependent Metabolism
Source: MDPI journal article supplement (doi:10.3390/ijms232214052), 2022-11-14
Supplement: s1 [file s1]

# Severe Obstructive Sleep Apnea Disrupts Vigilance-State-Dependent Metabolism

Felix Schmidt <sup>1,2</sup>, Nora Nowak <sup>3</sup>, Patrick Baumgartner <sup>1,2</sup>, Thomas Gaisl <sup>1,2</sup>, Stefan Malesevic <sup>1,2</sup>, Bettina Streckenbach <sup>3</sup>, Noriane A. Sievi <sup>2</sup>, Esther I. Schwarz <sup>1,2</sup>, Renato Zenobi <sup>3</sup>, Steven A. Brown <sup>4†</sup>, Malcolm Kohler <sup>1,2,5\*,†</sup>

Online Data Supplement

This supplementary information contains:

*Methods*

Supplementary Table S1

*Results*

Supplementary Table S2

Supplementary Figure S1

## METHODS

Table S1: Stratification of 149 suspected OSA patients out of cross-sectional nested case-control study by Nowak et al. 2021. This secondary analysis focus on stratification 2.

|                                                     |                  | OSA                                                   |                                                           |                            | Control                                              |                                                           |                            |
|-----------------------------------------------------|------------------|-------------------------------------------------------|-----------------------------------------------------------|----------------------------|------------------------------------------------------|-----------------------------------------------------------|----------------------------|
|                                                     | All participants | stratification 1<br>ODI>30 or<br>(ODI>10 &<br>ESS>10) | <b>stratification 2<br/>ODI&gt;30 &amp;<br/>ESS&gt;10</b> | stratification 3<br>ODI>30 | stratification 1<br>ODI<5 or<br>(ODI<10 &<br>ESS<11) | <b>stratification 2<br/>ODI&lt;10 &amp;<br/>ESS&lt;11</b> | stratification 3<br>ODI<10 |
| <b>Number of subjects (N)</b>                       | 149              | 51                                                    | <b>18</b>                                                 | 36                         | 33                                                   | <b>26</b>                                                 | 47                         |
| <b>Age, mean (SD), years</b>                        | 53.3 (13.7)      | 55 (13.4)                                             | <b>51.6 (10.2)</b>                                        | 53.6 (13)                  | 48.5 (14.6)                                          | <b>49.7 (14.3)</b>                                        | 49.3 (14.6)                |
| <b>male sex, n (%)</b>                              | 108 (72.5%)      | 35 (68.6%)                                            | <b>13 (72.2%)</b>                                         | 26 (72.2%)                 | 20 (60.6%)                                           | <b>17 (65.4%)</b>                                         | 30 (63.8%)                 |
| <b>BMI, mean (SD), kg/m2</b>                        | 30.1 (6.6)       | 33 (6.5)                                              | <b>33.1 (6.7)</b>                                         | 34 (6.5)                   | 27.2 (6.1)                                           | <b>28 (6.4)</b>                                           | 27.1 (5.5)                 |
| <b>active smoker, n (%)</b>                         | 31 (20.8%)       | 17 (33.3%)                                            | <b>7 (38.9%)</b>                                          | 14 (38.9%)                 | 6 (18.2%)                                            | <b>5 (19.2%)</b>                                          | 10 (21.3%)                 |
| <b>former smoker, n (%)</b>                         | 53 (35.6%)       | 16 (31.4%)                                            | <b>4 (22.2%)</b>                                          | 9 (25%)                    | 11 (33.3%)                                           | <b>10 (38.5%)</b>                                         | 16 (34%)                   |
| <b>AHI at diagnosis, mean (SD), events per hour</b> | 19.6 (17)        | 34.8 (18)                                             | <b>42.9 (15)</b>                                          | 42.7 (15)                  | 5.9 (5)                                              | <b>5.3 (3)</b>                                            | 6.4 (5)                    |

|                                                                  |             |             |                    |             |           |                |           |
|------------------------------------------------------------------|-------------|-------------|--------------------|-------------|-----------|----------------|-----------|
| <b>ODI<sub>4</sub>% at diagnosis, mean (SD), events per hour</b> | 20.8 (17.5) | 38.3 (17.5) | <b>46.5 (14.7)</b> | 46.8 (13.2) | 4.4 (2.7) | <b>5 (2.6)</b> | 5.2 (2.6) |
| <b>ESS at diagnosis, mean (SD), points</b>                       | 8.9 (4.5)   | 11 (4.8)    | <b>14.2 (2.8)</b>  | 10 (5.2)    | 7.4 (3.4) | <b>6 (2.4)</b> | 9.4 (4.5) |

*Definition of abbreviations:* AHI: apnea-hypopnea-index; BMI: body mass index; ESS: Epworth Sleepiness Scale; ODI: oxygen desaturation index.

## RESULTS

Table S2: 18 identified compounds showed weak to strong evidence for a difference in breath profiles of symptomatic OSA patients compared to controls.

| Metabolite  | Key biochemical metabolism <sup>1</sup> | Selected other linking pathways <sup>1,2</sup>                                                                   | Evidence level |
|-------------|-----------------------------------------|------------------------------------------------------------------------------------------------------------------|----------------|
| Deoxyribose | Energy metabolism                       | Glucuronate interconversions/ Pentose phosphate pathway; Purines & Pyrimidine                                    | $p \leq 0.05$  |
| Glycerate   | Carbohydrate metabolism                 | Glucuronate interconversions/ Pentose phosphate pathway; Glycolysis; Gluconeogenesis; Glyoxylate cycle; ...      | $p \leq 0.1$   |
| Pyruvate    | Carbohydrate metabolism                 | Glycolysis & Gluconeogenesis; TCA cycle; Pentose phosphate pathway; Amino acids pathways; Pyruvate turnover; ... | $p \leq 0.005$ |
| Lactate     | Carbohydrate metabolism                 | Glycolysis & Gluconeogenesis; Propanoate metabolism; Pyruvate turnover; ...                                      | $p \leq 0.05$  |
| Malate      | Carbohydrate metabolism                 | TCA cycle; Glyoxylate metabolism; Pyruvate metabolism; ...                                                       | $p \leq 0.05$  |
| Succinate   | Carbohydrate metabolism                 | TCA cycle; Amino acids pathways, Pyruvate metabolism, Propanoate & Butanoate metabolism                          | $p \leq 0.1$   |
| Glyoxylate  | Carbohydrate metabolism                 | Glyoxylate metabolism; Purine metabolism; Amino acids pathways; ...                                              | $p \leq 0.05$  |

|                        |                         |                                                                                                                                            |                |
|------------------------|-------------------------|--------------------------------------------------------------------------------------------------------------------------------------------|----------------|
| Hydroxypyruvate        | Carbohydrate metabolism | Glyoxylate metabolism; Glycine, serine and threonine metabolism                                                                            | $p \leq 0.1$   |
| Succinate semialdehyde | Carbohydrate metabolism | Butanoate metabolism; Glutamate decarboxylation pathway                                                                                    | $p \leq 0.005$ |
| Hydroxybutanoate       | Carbohydrate metabolism | Butanoate metabolism; Ketone body pathway; ...                                                                                             | $p \leq 0.05$  |
| Hydroxypropanoate      | Nucleotide metabolism   | Propanoate metabolism; Pyrimidine metabolism; ...                                                                                          | $p \leq 0.05$  |
| Aminobutanoate         | Amino acid metabolism   | Butanoate metabolism; Glutamate decarboxylation pathway; Alanine, aspartate and glutamate metabolism; Arginine and proline metabolism; ... | $p \leq 0.005$ |
| Malonate semialdehyde  | Amino acid metabolism   | Propanoate metabolism; Various amino acid pathways; Pyrimidine metabolism                                                                  | $p \leq 0.005$ |
| Acetoacetate           | Amino acid metabolism   | Butanoate metabolism; Various amino acid pathways; Ketone body pathway                                                                     | $p \leq 0.005$ |
| Carnitine              | Lipid metabolism        | Fatty acid metabolism; transport                                                                                                           | $p \leq 0.005$ |
| Dehydrocarnitine       | Lipid metabolism        | Fatty acid metabolism; transport                                                                                                           | $p \leq 0.005$ |
| Acetylcarnitine        | Lipid metabolism        | Fatty acid metabolism; transport                                                                                                           | $p \leq 0.05$  |
| Acrylcarnitine         | Lipid metabolism        | Fatty acid metabolism; transport                                                                                                           | $p \leq 0.05$  |

<sup>1</sup> Key pathways according KEGG release 102.0; <sup>2</sup> Identified pathways by MetaboAnalyst 5.0; TCA - tricarboxylic acid cycle; ... - indicates many more linking pathways exists.

## SUPPLEMENT FIGURE

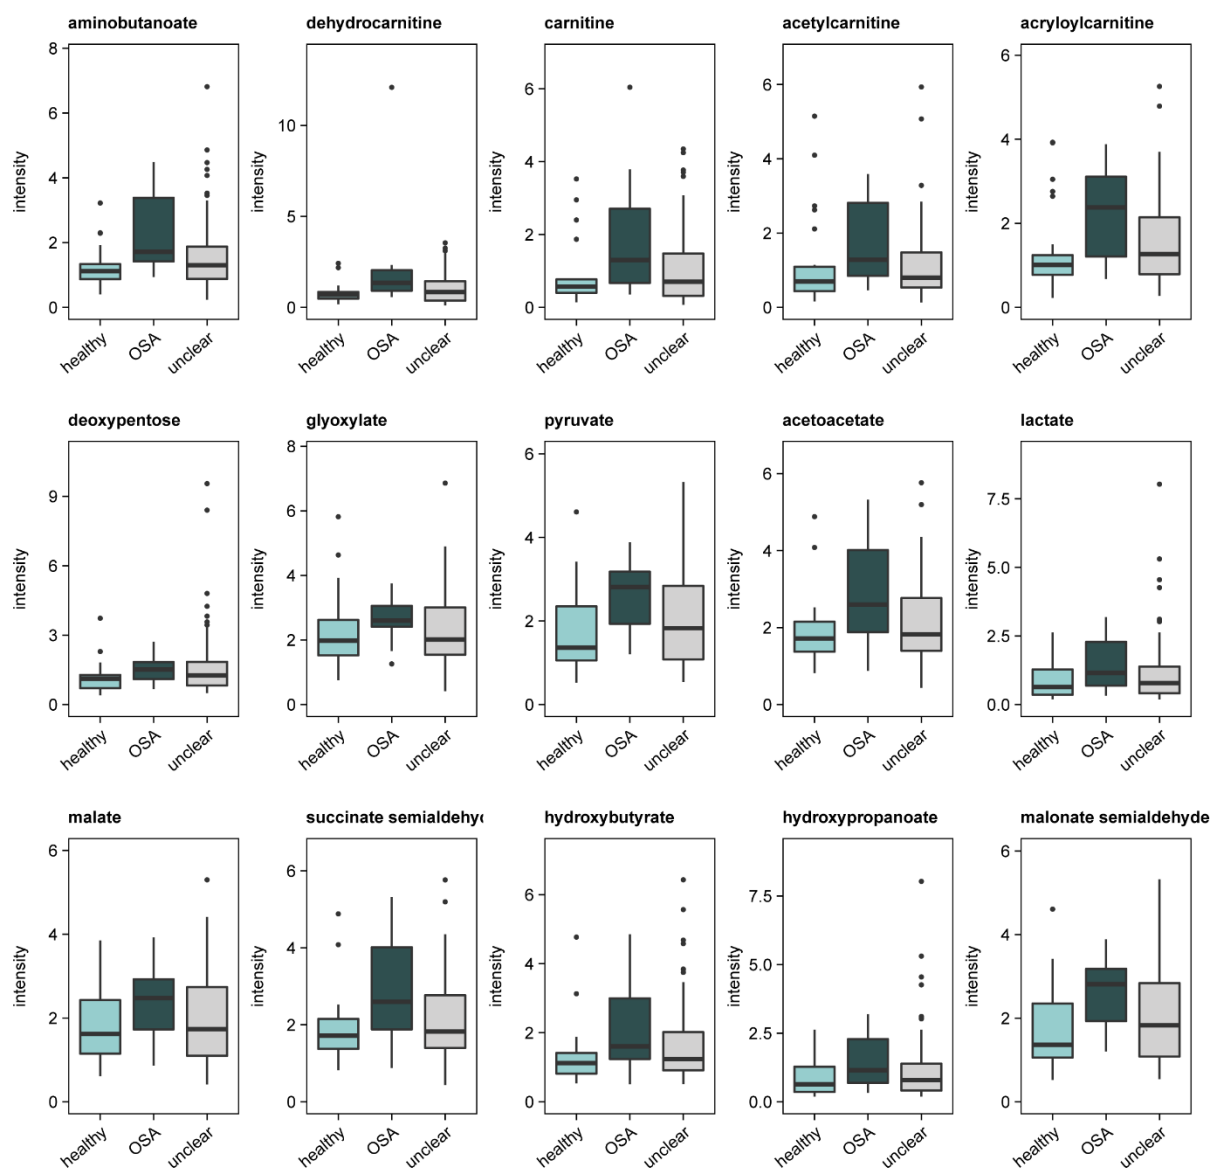

Figure S1: 15 compounds with moderate or strong evidence for a difference are shown in boxplots. Boxplots (center line: median, box limits: 25th and 75th percent quantile, whisker length: 1.5 interquartile range). OSA - symptomatic OSA (symptomatic OSA was defined as ODI > 30 events/h and an ESS > 10 points); Healthy - controls (selected according to an ODI < 10/h and an ESS < 11 points); Unclear – other subjects (not stratified in OSA or Control group; see Table E1)
